# Supplementary material for: Etching and polymerization reactions of alkoxythiophenes in HKUST-1: choosing between filled and core–shell MOF/polymer composite structures
Source: Royal Society of Chemistry journal article supplement (doi:10.1039/d1ce00279a), 2021-01-01

# Quantachrome TouchWin™

version 1.22

Copyright ©1994-2017 Quantachrome Instruments

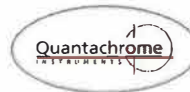

**Report date:** Tue Mar 17 2020      **Operator:** pwoodell  
**Filename:** MOF - St2\_20200316\_143047.qcuPhysIso

## Analysis Data

### Sample

**ID** hexane Ioaded edot      **Weight** 0.1000g  
**Description** 16MAR20

### Analysis

**Data ID** {4bdf261d-d9a0-496d-a122-0fa11f835f60}  
**Operator** pwoodell      **Date** 2020.03.16      **Duration** 299.2min  
**Instrument** St 2 on NOVA touch 2LX [s/n:1050005564]      **Firmware** 1.05  
**Comments**  
**Ambient Temp.** 24.32 °C      **Void Volume Mode** He Measure      **Cold Zone** 2.90922 mL  
**Warm Zone** 3.68063 mL      **Cell Type** 9mm with rod      **Thermal Delay** 120 sec  
**Po Mode** Continuous

### Adsorbate

**Name** Nitrogen      **Molecular Weight** 28.013 g/mol      **Cross Section Area** 16.2 Å<sup>2</sup>/mol  
**Non-ideality** 6.580000e-05 1/torr      **Bath Temperature** 77.35 K

### Degas information

**Type** Vacuum Degassing  
**Operator** pw  
**Description**  
**Heating** Heat to 120.0 °C at 10.0 °C/min then hold for 180 min

## Data Reduction Parameters

### Data Reduction Parameters

**Thermal Transpiration** no

### DFT Method

**Model** N2 @ 77K on silica (cyl./spher. pore)(NLDFT Ads. model)  
**Min P/Po** 0.02      **Max P/Po** 0.99      **Moving pt. avg.** off

### Adsorbate Model

**Name** Nitrogen      **Molecular Weight** 28.0134 g      **Cross Section Area** 16.2 Å<sup>2</sup>/molec  
**Bath Temperature** 77.35 K

## Isotherm-Isotherm

○ Ads    ○ Des

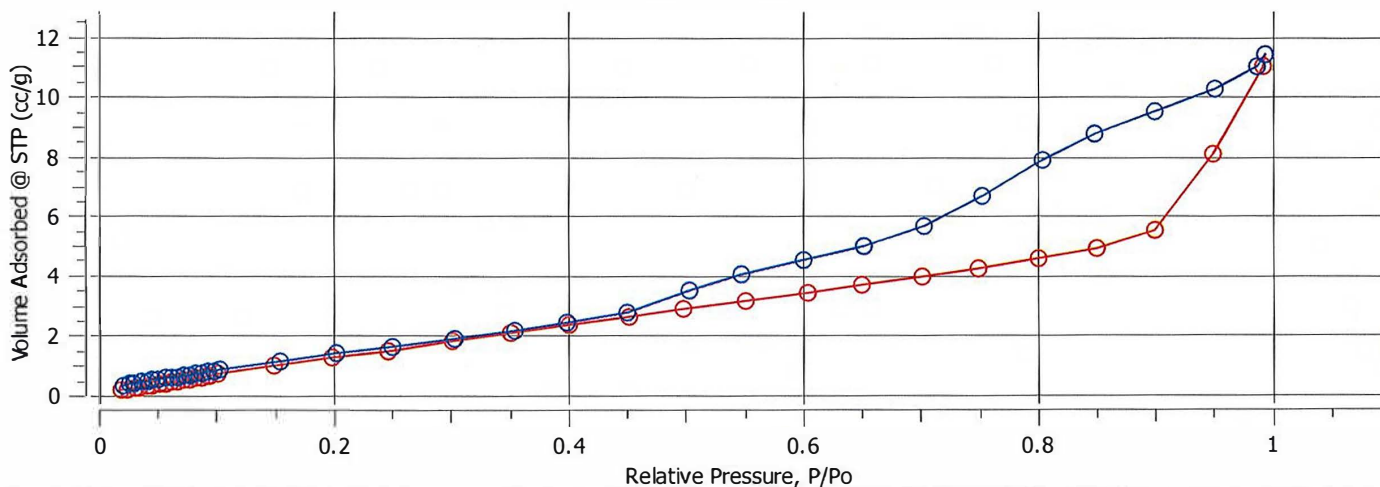

**Isotherm Branch** Adsorption  
**Correlation coeff., r** 0.990647

### Multipoint BET Summary/Results

**Slope** 471.708  
**C constant** 6.85749

**Intercept** 80.5308  
**Surface area** 6.306 m<sup>2</sup>/g

**Pore Volume Mode (Pore Width)** 0.0098 cc/g  
4.7280 nm

### DFT method Summary/Results

**Surface Area** 5.1648 m<sup>2</sup>/g  
**Fitting Error** 8.1801 %

**Lower Confidence Limit** 1.7800 nm  
**Notes** Adsorption data

# Quantachrome TouchWin™

version 1.22

Copyright ©1994-2017 Quantachrome Instruments

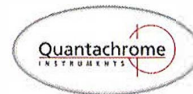

**Report date:** Mon Mar 16 2020      **Operator:** pwoodell  
**Filename:** MOF - St2\_20200316\_073537.qcuPhysIso

## Analysis Data

### Sample

**ID** hexane loaded meo      **Weight** 0.0510g  
**Description** 16MAR20

### Analysis

**Data ID** {f4df2dac-0488-4d2b-89f6-a641fc8167b7}  
**Operator** pwoodell      **Date** 2020.03.16      **Duration** 367.7 min  
**Instrument** St 2 on NOVA touch 2LX [s/n:1050005564]      **Firmware** 1.05  
**Comments**  
**Ambient Temp.** 25.83 °C      **Void Volume Mode** He Measure      **Cold Zone** 3.01097 mL  
**Warm Zone** 3.76154 mL      **Cell Type** 9mm with rod      **Thermal Delay** 120 sec  
**Po Mode** Continuous

### Adsorbate

**Name** Nitrogen      **Molecular Weight** 28.013g/mol      **Cross Section Area** 16.2 Å<sup>2</sup>/mol  
**Non-ideality** 6.580000e-05 1/torr      **Bath Temperature** 77.35 K

### Degas information

**Type** Vacuum Degassing  
**Operator** pw  
**Description**  
**Heating** Heat to 120.0 °C at 10.0 °C/min then hold for 180 min

## Data Reduction Parameters

### Data Reduction Parameters

**Thermal Transpiration** no

### DFT Method

**Model** N2 @ 77K on silica (cyl./spher. pore)(NLDFT Ads. model)  
**Min P/Po** 0.02      **Max P/Po** 0.99      **Moving pt. avg.** off

### Adsorbate Model

**Name** Nitrogen      **Molecular Weight** 28.0134g      **Cross Section Area** 16.2 Å<sup>2</sup>/molec  
**Bath Temperature** 77.35 K

## Isotherm-Isotherm

○ Ads    ○ Des

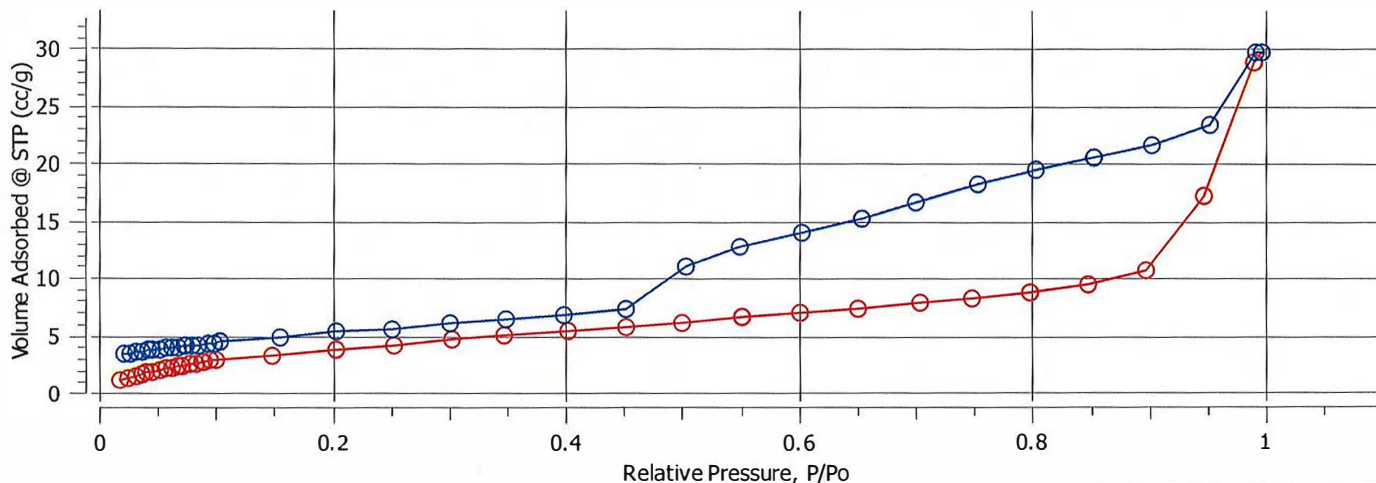

## Multipoint BET Summary/Results

**Isotherm Branch** Adsorption  
**Correlation coeff., r** 0.99765

**Slope** 205.954  
**C constant** 22.6179

**Intercept** 9.52697  
**Surface area** 16.162 m<sup>2</sup>/g

## DFT method Summary/Results

**Pore Volume Mode (Pore Width)** 0.0207 cc/g  
 3.7750 nm

**Surface Area** 11.5001 m<sup>2</sup>/g  
**Fitting Error** 2.9843%

**Lower Confidence Limit** 1.7800 nm  
**Notes** Adsorption data

# Quantachrome TouchWin™

version 1.22

Copyright ©1994-2017 Quantachrome Instruments

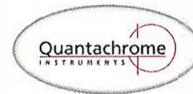

**Report date:** Mon Mar 16 2020      **Operator:** pwoodell  
**Filename:** MOF - St1\_20200316\_073537.qcuPhysIso

## Analysis Data

### Sample

**ID** hexane loaded hexo      **Weight** 0.0490g  
**Description** 16MAR20

### Analysis

|                      |                                         |                         |              |                      |           |
|----------------------|-----------------------------------------|-------------------------|--------------|----------------------|-----------|
| <b>Data ID</b>       | {6e0c98e9-48d0-4dfd-b25c-acc029747f19}  |                         |              | <b>Duration</b>      | 376.2min  |
| <b>Operator</b>      | pwoodell                                | <b>Date</b>             | 2020.03.16   | <b>Firmware</b>      | 1.05      |
| <b>Instrument</b>    | St 1 on NOVA touch 2LX [s/n:1050005564] |                         |              | <b>Cold Zone</b>     | 2.97974mL |
| <b>Comments</b>      |                                         | <b>Void Volume Mode</b> | He Measure   | <b>Thermal Delay</b> | 120sec    |
| <b>Ambient Temp.</b> | 25.80°C                                 | <b>Cell Type</b>        | 9mm with rod |                      |           |
| <b>Warm Zone</b>     | 3.63928mL                               |                         |              |                      |           |
| <b>Po Mode</b>       | Continuous                              |                         |              |                      |           |

### Adsorbate

**Name** Nitrogen      **Molecular Weight** 28.013g/mol      **Cross Section Area** 16.2Å<sup>2</sup>/mol  
**Non-ideality** 6.580000e-05 1/torr      **Bath Temperature** 77.35K

### Degas information

**Type** Vacuum Degassing  
**Operator** pw  
**Description**  
**Heating** Heat to 120.0 °C at 10.0 °C/min then hold for 180 min

## Data Reduction Parameters

### Data Reduction Parameters

**Thermal Transpiration** no

### DFT Method

**Model** N2 @ 77K on silica (cyl. pore)(NLDFT Ads. model)  
**Min P/Po** 0.02      **Max P/Po** 0.99      **Moving pt. avg.** off

### Adsorbate Model

**Name** Nitrogen      **Molecular Weight** 28.0134g      **Cross Section Area** 16.2Å<sup>2</sup>/molec  
**Bath Temperature** 77.35K

## Isotherm-Isotherm

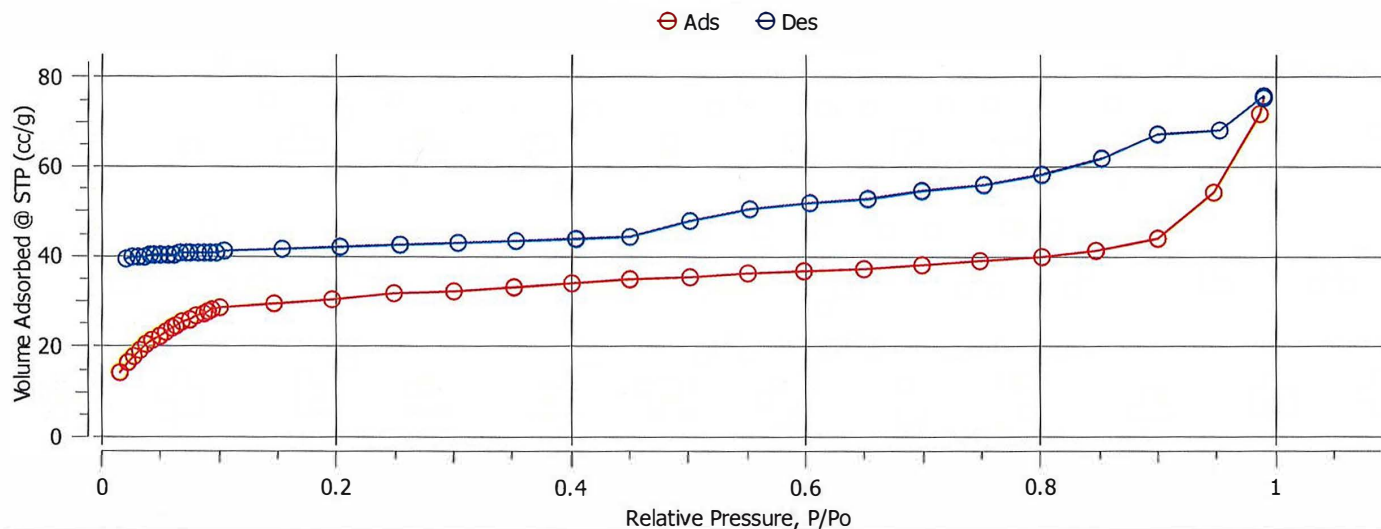

### Multipoint BET Summary/Results

|                             |            |                   |         |                     |                           |
|-----------------------------|------------|-------------------|---------|---------------------|---------------------------|
| <b>Isotherm Branch</b>      | Adsorption | <b>Slope</b>      | 25.788  | <b>Intercept</b>    | 0.539313                  |
| <b>Correlation coeff, r</b> | 0.999326   | <b>C constant</b> | 48.8164 | <b>Surface area</b> | 132.278 m <sup>2</sup> /g |

### DFT method Summary/Results

|                                      |                          |                      |                           |                               |                 |
|--------------------------------------|--------------------------|----------------------|---------------------------|-------------------------------|-----------------|
| <b>Pore Volume Mode (Pore Width)</b> | 0.1051 cc/g<br>2.1860 nm | <b>Surface Area</b>  | 87.4229 m <sup>2</sup> /g | <b>Lower Confidence Limit</b> | 1.6310 nm       |
|                                      |                          | <b>Fitting Error</b> | 0.4540%                   | <b>Notes</b>                  | Adsorption data |

1st Run

# Quantachrome TouchWin™

version 1.22

Copyright ©1994-2017 Quantachrome Instruments

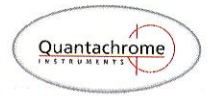

**Report date:** Tue Mar 24 2020      **Operator:** pwoodell  
**Filename:** Neat MEO.qcuPhysIso

## Analysis Data

**Sample**  
**ID** neat meo      **Weight** 0.0390g  
**Description**

**Analysis**  
**Data ID** {94318505-bc7d-42f6-8c7a-d0edabcfb2b9}  
**Operator** pwoodell      **Date** 2020.03.23  
**Instrument** St 2 on NOVA touch 2LX [s/n:1050005564]      **Duration** 312.5min  
**Comments**      **Firmware** 1.05  
**Ambient Temp.** 24.53°C      **Void Volume Mode** He Measure      **Cold Zone** 2.86585mL  
**Warm Zone** 3.73686mL      **Cell Type** 9mm with rod      **Thermal Delay** 120sec  
**Po Mode** Continuous

**Adsorbate**  
**Name** Nitrogen      **Molecular Weight** 28.013g/mol      **Cross Section Area** 16.2Å<sup>2</sup>/mol  
**Non-ideality** 6.580000e-05<sub>1/torr</sub>      **Bath Temperature** 77.35K

**Degas information**  
**Type** Vacuum Degassing  
**Operator** pw  
**Description**  
**Heating** Heat to 120.0 °C at 10.0 °C/min then hold for 180 min  
Heat to 200.0 °C at 10.0 °C/min then hold for 1440 min

## Data Reduction Parameters

**Data Reduction Parameters**  
**Thermal Transpiration** no

**DFT Method**  
**Model** N2 @ 77K on silica (cyl./spher. pore)(NLDFT Ads. model)  
**Min P/Po** 0.02      **Max P/Po** 0.99      **Moving pt. avg.** off

**Adsorbate Model**  
**Name** Nitrogen      **Molecular Weight** 28.0134g      **Cross Section Area** 16.2Å<sup>2</sup>/molec  
**Bath Temperature** 77.35K

## Isotherm-Isotherm

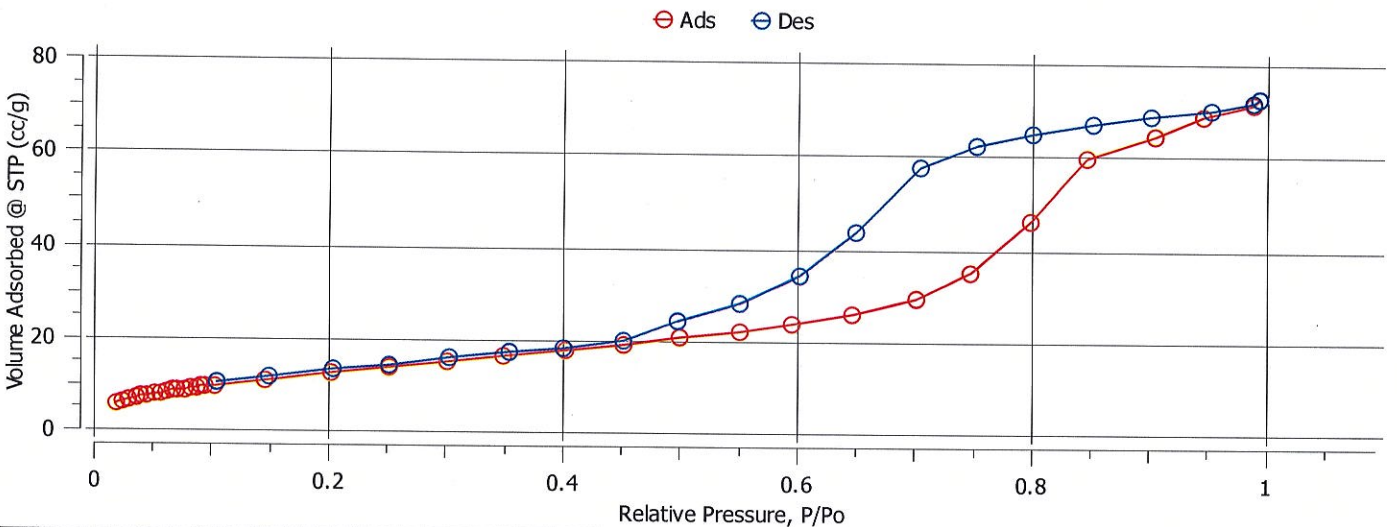

## Multipoint BET Summary/Results

**Isotherm Branch** Adsorption  
**Correlation coeff., r** 0.99917

**Slope** 79.0974  
**C constant** 56.9659

**Intercept** 1.41331  
**Surface area** 43.255 m<sup>2</sup>/g

## DFT method Summary/Results

**Pore Volume** 0.0992 cc/g  
**Mode (Pore Width)** 12.9910 nm

**Surface Area** 45.6429 m<sup>2</sup>/g  
**Fitting Error** 2.6771%

**Lower Confidence Limit** 1.7800 nm  
**Notes** Adsorption data

1st Run

# Quantachrome TouchWin™

version 1.22

Copyright ©1994-2017 Quantachrome Instruments

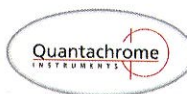

**Report date:** Tue Mar 24 2020      **Operator:** pwoodell  
**Filename:** Neat HEXO.qcuPhysIso

## Sample Analysis Data

**Sample ID:** neat hexo      **Weight:** 0.0380g

**Analysis Data ID:** {451720cf-ee93-43f1-aa07-95b747dc6697}  
**Operator:** pwoodell      **Date:** 2020.03.23  
**Instrument Comments:** St 1 on NOVA touch 2LX [s/n:1050005564]      **Duration:** 325.3min  
**Firmware:** 1.05

**Ambient Temp.:** 24.08°C      **Void Volume Mode:** He Measure      **Cold Zone:** 2.95379mL  
**Warm Zone:** 3.67985mL      **Cell Type:** 9mm with rod      **Thermal Delay:** 120sec  
**Po Mode:** Continuous

**Adsorbate Name:** Nitrogen      **Molecular Weight:** 28.013g/mol      **Cross Section Area:** 16.2Å<sup>2</sup>/mol  
**Non-ideality:** 6.580000e-05 1/torr      **Bath Temperature:** 77.35K

**Degas information Type:** Vacuum Degassing  
**Operator:** pw  
**Description:** Heat to 120.0 °C at 10.0 °C/min then hold for 180 min  
Heat to 200.0 °C at 10.0 °C/min then hold for 1440 min

## Data Reduction Parameters

**Thermal Transpiration:** no

**DFT Method Model:** N2 @ 77K on silica (cyl. pore)(NLDFT Ads. model)  
**Min P/Po:** 0.02      **Max P/Po:** 0.99      **Moving pt. avg.:** off

**Adsorbate Model Name:** Nitrogen      **Molecular Weight:** 28.0134g      **Cross Section Area:** 16.2Å<sup>2</sup>/molec  
**Bath Temperature:** 77.35K

## Isotherm-Isotherm

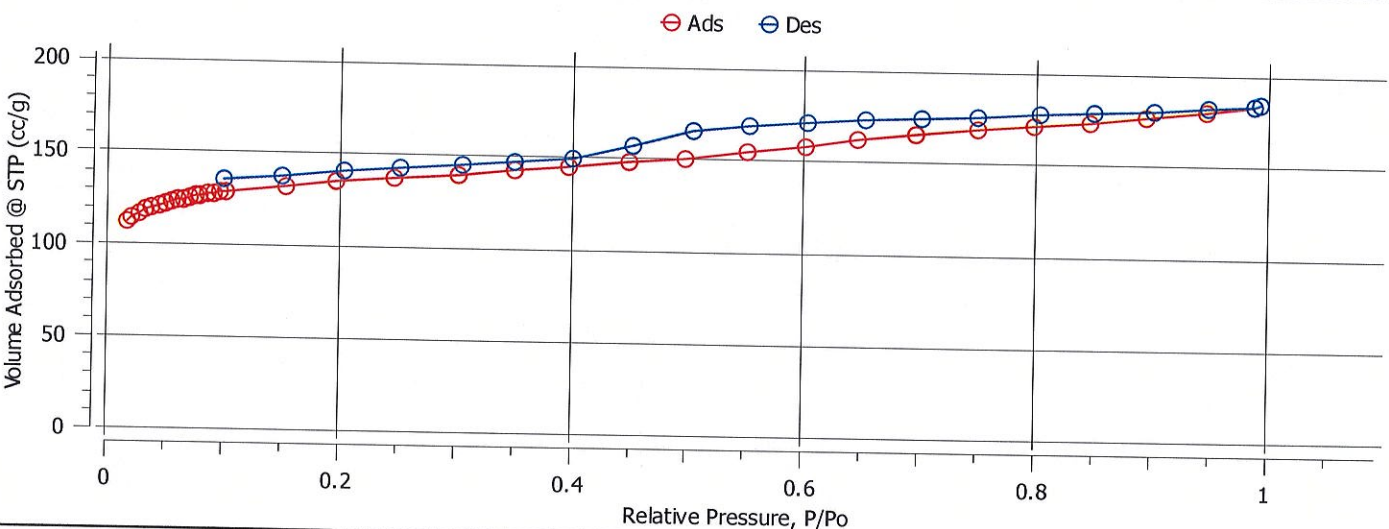

**Isotherm Branch:** Adsorption  
**Correlation coeff., r:** 0.999956

**Multipoint BET Summary/Results**  
**Slope:** 6.8271      **Intercept:** 0.00454176  
**C constant:** 1504.18      **Surface area:** 509.763 m<sup>2</sup>/g

**DFT method Summary/Results**  
**Pore Volume Mode (Pore Width):** 0.2730cc/g      1.6310nm  
**Surface Area:** 684.4108m<sup>2</sup>/g      **Lower Confidence Limit:** 1.6310nm  
**Fitting Error:** 0.0861%      **Notes:** Adsorption data

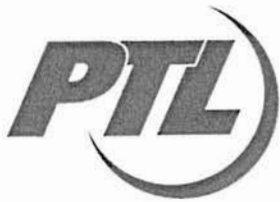

GAS PHYSISORPTION ISOTHERM DEGASSING CONDITIONS

| SAMPLE ID   | EXTERNAL DEGASSING CONDITIONS |             |           | IN-SITU VACUUM DEGASSING CONDITIONS |             |
|-------------|-------------------------------|-------------|-----------|-------------------------------------|-------------|
|             | DURATION                      | TEMPERATURE | TECHNIQUE | DURATION                            | TEMPERATURE |
| HKUST-1 MOF |                               |             |           |                                     |             |
| HK          | 2 Hours                       | 150°C       | Vacuum    | 60 Minutes                          | 150°C       |

GAS PHYSISORPTION ISOTHERM DATA SUMMARY

| SAMPLE ID   | BET SPECIFIC SURFACE AREA (m <sup>2</sup> /g) | BJH PORE VOLUME 1.7 – 300 nm (cm <sup>3</sup> /g) | BJH AVG PORE DIAMETER 1.7 – 300 nm (nm) | ADSORBATE GAS |
|-------------|-----------------------------------------------|---------------------------------------------------|-----------------------------------------|---------------|
| HKUST-1 MOF |                                               |                                                   |                                         |               |
| HK          | 1993.08                                       | 0.13                                              | 3.62                                    | Nitrogen      |

GAS PHYSISORPTION ISOTHERM DATA SUMMARY (continued)

| SAMPLE ID   | DFT PORE VOLUME                   |                      | DFT PORE AREA                  |                      |
|-------------|-----------------------------------|----------------------|--------------------------------|----------------------|
|             | TOTAL VOLUME (cm <sup>3</sup> /g) | PORE SIZE RANGE (nm) | TOTAL AREA (m <sup>2</sup> /g) | PORE SIZE RANGE (nm) |
| HKUST-1 MOF |                                   |                      |                                |                      |
| HK          | 0.70                              | ≤ 172.079            | 2135.53                        | ≥ 0.393              |

*JF 2010.06.09  
CL 2011.06.09*

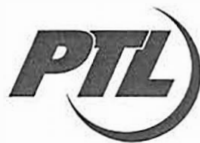

Particle Technology Labs

UNIVERSITY OF SOUTH CAROLINA AIKEN

3Flex 5.02

3Flex Version 5.02  
Serial # 862 Unit 1 Port 1

Sample: 5149970A2  
Operator: JF  
Submitter: Particle Technology Labs  
File: C:\3Flex\data\51499-70\5149970A2.SMP

|                                                  |                                                      |
|--------------------------------------------------|------------------------------------------------------|
| Started: 6/7/2021 1:28:13 PM                     | Analysis adsorptive: N2                              |
| Completed: 6/9/2021 3:38:58 PM                   | Analysis bath temp.: 77.206 K                        |
| Report time: 6/9/2021 3:52:46 PM                 | Thermal correction: No                               |
| Sample mass: 0.0316 g                            | Ambient free space: 20.9316 cm <sup>3</sup> Measured |
| Analysis free space: 63.6329 cm <sup>3</sup>     | Equilibration interval: 20 to 30 s                   |
| Low pressure dose: 5.0000 cm <sup>3</sup> /g STP | Sample density: 1.000 g/cm <sup>3</sup>              |
| Automatic degas: No                              |                                                      |

Comments: HKUST-1 MOF HK PTL Project#51499-70 PTL ID: 486157-70

### Isotherm Linear Plot

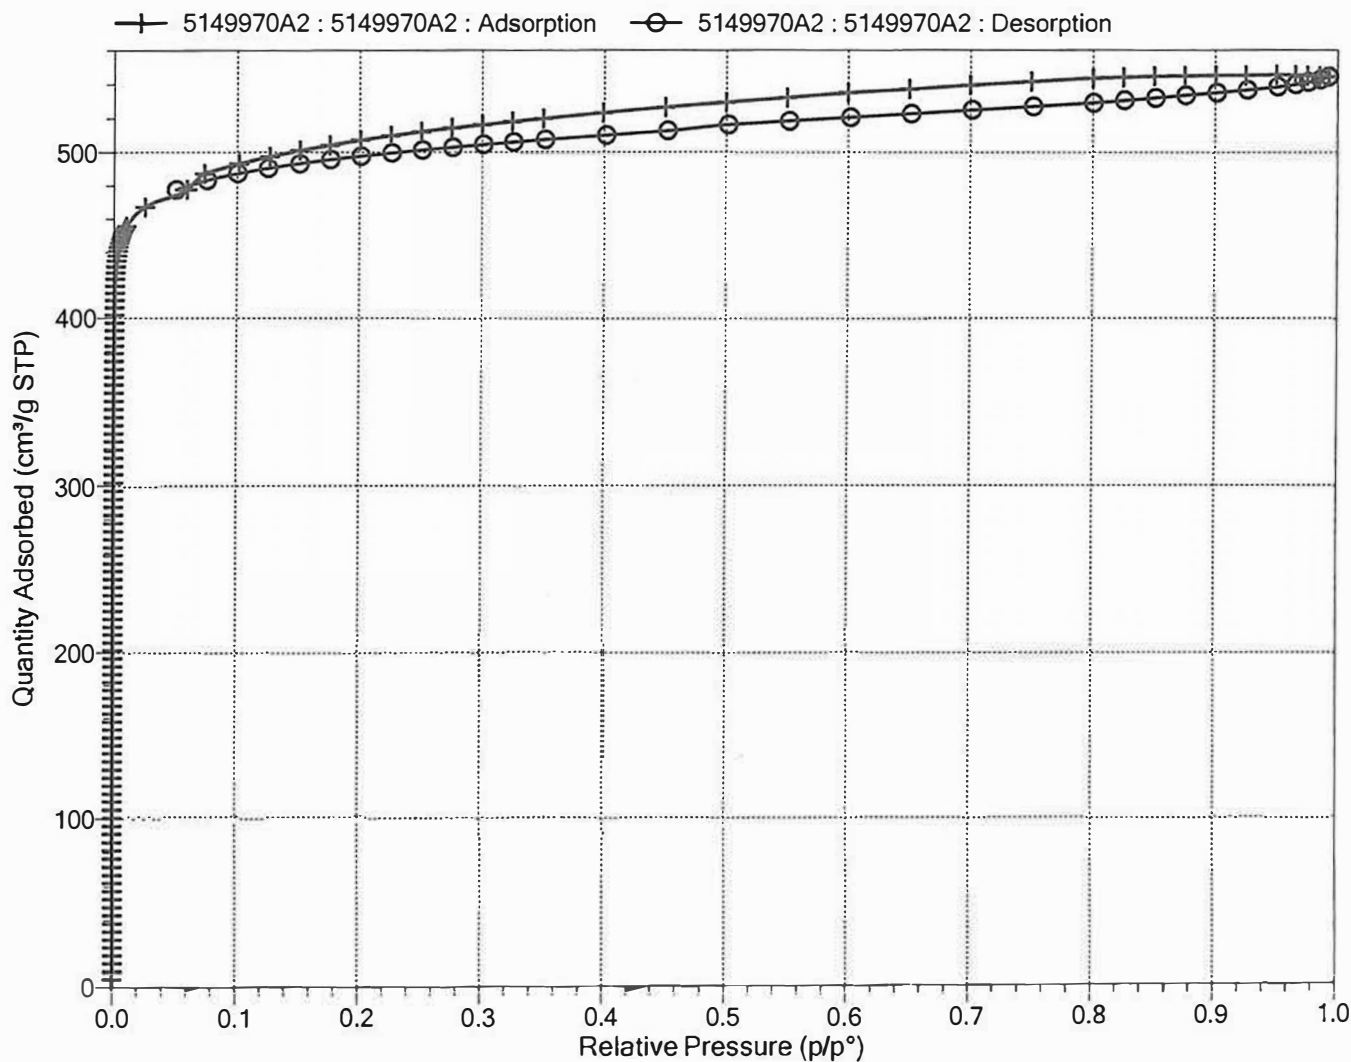

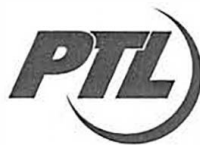

Particle Technology Labs

UNIVERSITY OF SOUTH CAROLINA AIKEN

3Flex 5.02

3Flex Version 5.02  
Serial # 862 Unit 1 Port 1

20210609

Sample: 5149970A2  
Operator: JF  
Submitter: Particle Technology Labs  
File: C:\3Flex\data\51499-70\5149970A2.SMP

|                                                  |                                                      |
|--------------------------------------------------|------------------------------------------------------|
| Started: 6/7/2021 1:28:13 PM                     | Analysis adsorptive: N2                              |
| Completed: 6/9/2021 3:38:58 PM                   | Analysis bath temp.: 77.206 K                        |
| Report time: 6/9/2021 3:52:46 PM                 | Thermal correction: No                               |
| Sample mass: 0.0316 g                            | Ambient free space: 20.9316 cm <sup>3</sup> Measured |
| Analysis free space: 63.6329 cm <sup>3</sup>     | Equilibration interval: 20 to 30 s                   |
| Low pressure dose: 5.0000 cm <sup>3</sup> /g STP | Sample density: 1.000 g/cm <sup>3</sup>              |
| Automatic degas: No                              |                                                      |

Comments: HKUST-1 MOF HK PTL Project#51499-70 PTL ID: 486157-70

### BET Report

BET surface area: 1,993.0809 ± 1.3464 m<sup>2</sup>/g  
Slope: 0.002184 ± 0.000001 g/cm<sup>3</sup> STP  
Y-intercept: 0.000000 ± 0.000000 g/cm<sup>3</sup> STP  
C: 7,537.777322  
Qm: 457.9081 cm<sup>3</sup>/g STP  
Correlation coefficient: 0.9999979  
Molecular cross-sectional area: 0.1620 nm<sup>2</sup>

| Relative Pressure (p/p°) | Quantity Adsorbed (cm <sup>3</sup> /g STP) | 1/[Q(p°/p - 1)] |
|--------------------------|--------------------------------------------|-----------------|
| 0.002256651              | 438.0128                                   | 0.000005        |
| 0.002819007              | 440.8257                                   | 0.000006        |
| 0.003462227              | 443.3873                                   | 0.000008        |
| 0.004176871              | 445.6883                                   | 0.000009        |
| 0.004950738              | 447.7374                                   | 0.000011        |
| 0.005788288              | 449.6296                                   | 0.000013        |
| 0.006679110              | 451.3510                                   | 0.000015        |
| 0.007624450              | 452.9148                                   | 0.000017        |
| 0.008585101              | 454.3199                                   | 0.000019        |
| 0.009604457              | 455.6602                                   | 0.000021        |
| 0.024760796              | 467.3299                                   | 0.000054        |



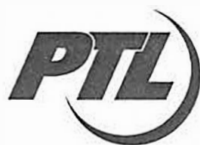

Particle Technology Labs

UNIVERSITY OF SOUTH CAROLINA AIKEN

3Flex 5.02

3Flex Version 5.02  
Serial # 862 Unit 1 Port 1

Sample: 5149970A2  
Operator: JF  
Submitter: Particle Technology Labs  
File: C:\3Flex\data\51499-70\5149970A2.SMP

Started: 6/7/2021 1:28:13 PM  
Completed: 6/9/2021 3:38:58 PM  
Report time: 6/9/2021 3:52:46 PM  
Sample mass: 0.0316 g  
Analysis free space: 63.6329 cm<sup>3</sup>  
Low pressure dose: 5.0000 cm<sup>3</sup>/g STP  
Automatic degas: No

Analysis adsorptive: N2  
Analysis bath temp.: 77.206 K  
Thermal correction: No  
Ambient free space: 20.9316 cm<sup>3</sup> Measured  
Equilibration interval: 20 to 30 s  
Sample density: 1.000 g/cm<sup>3</sup>

Comments: HKUST-1 MOF HK PTL Project#51499-70 PTL ID: 486157-70

### BET Surface Area Plot

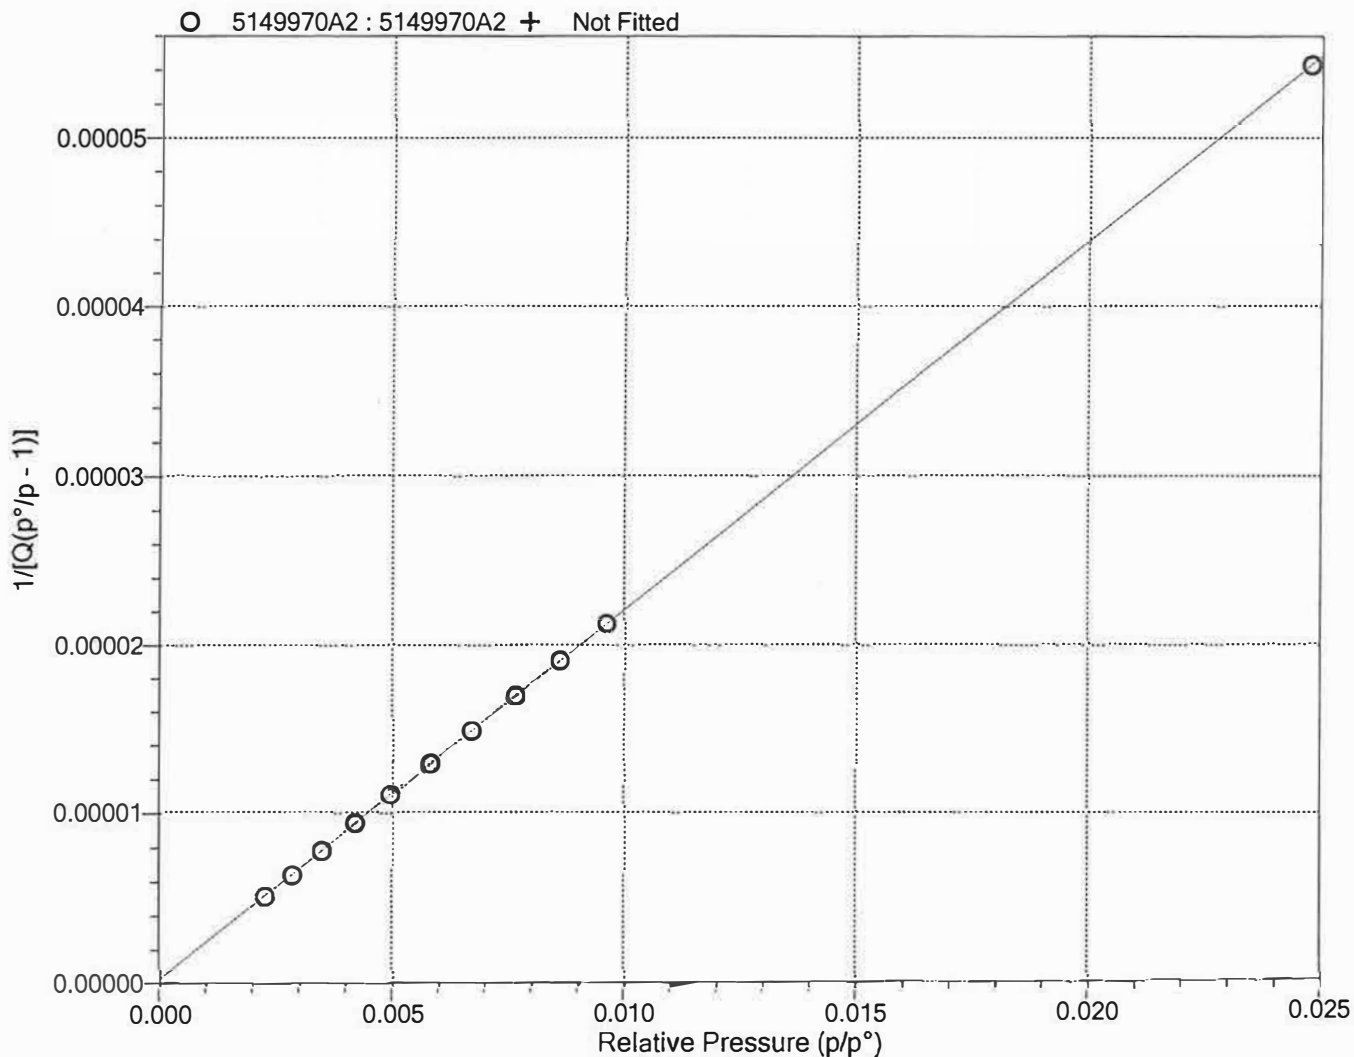

Supplement: d1ce00279a2.pdf [file d1ce00279a2.pdf]
