# Supplementary material for: Etching and polymerization reactions of alkoxythiophenes in HKUST-1: choosing between filled and core–shell MOF/polymer composite structures
Source: Royal Society of Chemistry journal article supplement (doi:10.1039/d1ce00279a), 2021-01-01
Supplement: d1ce00279a1.pdf [file d1ce00279a1.pdf]

Figure S17: Hexane loaded EDOT composite, etched

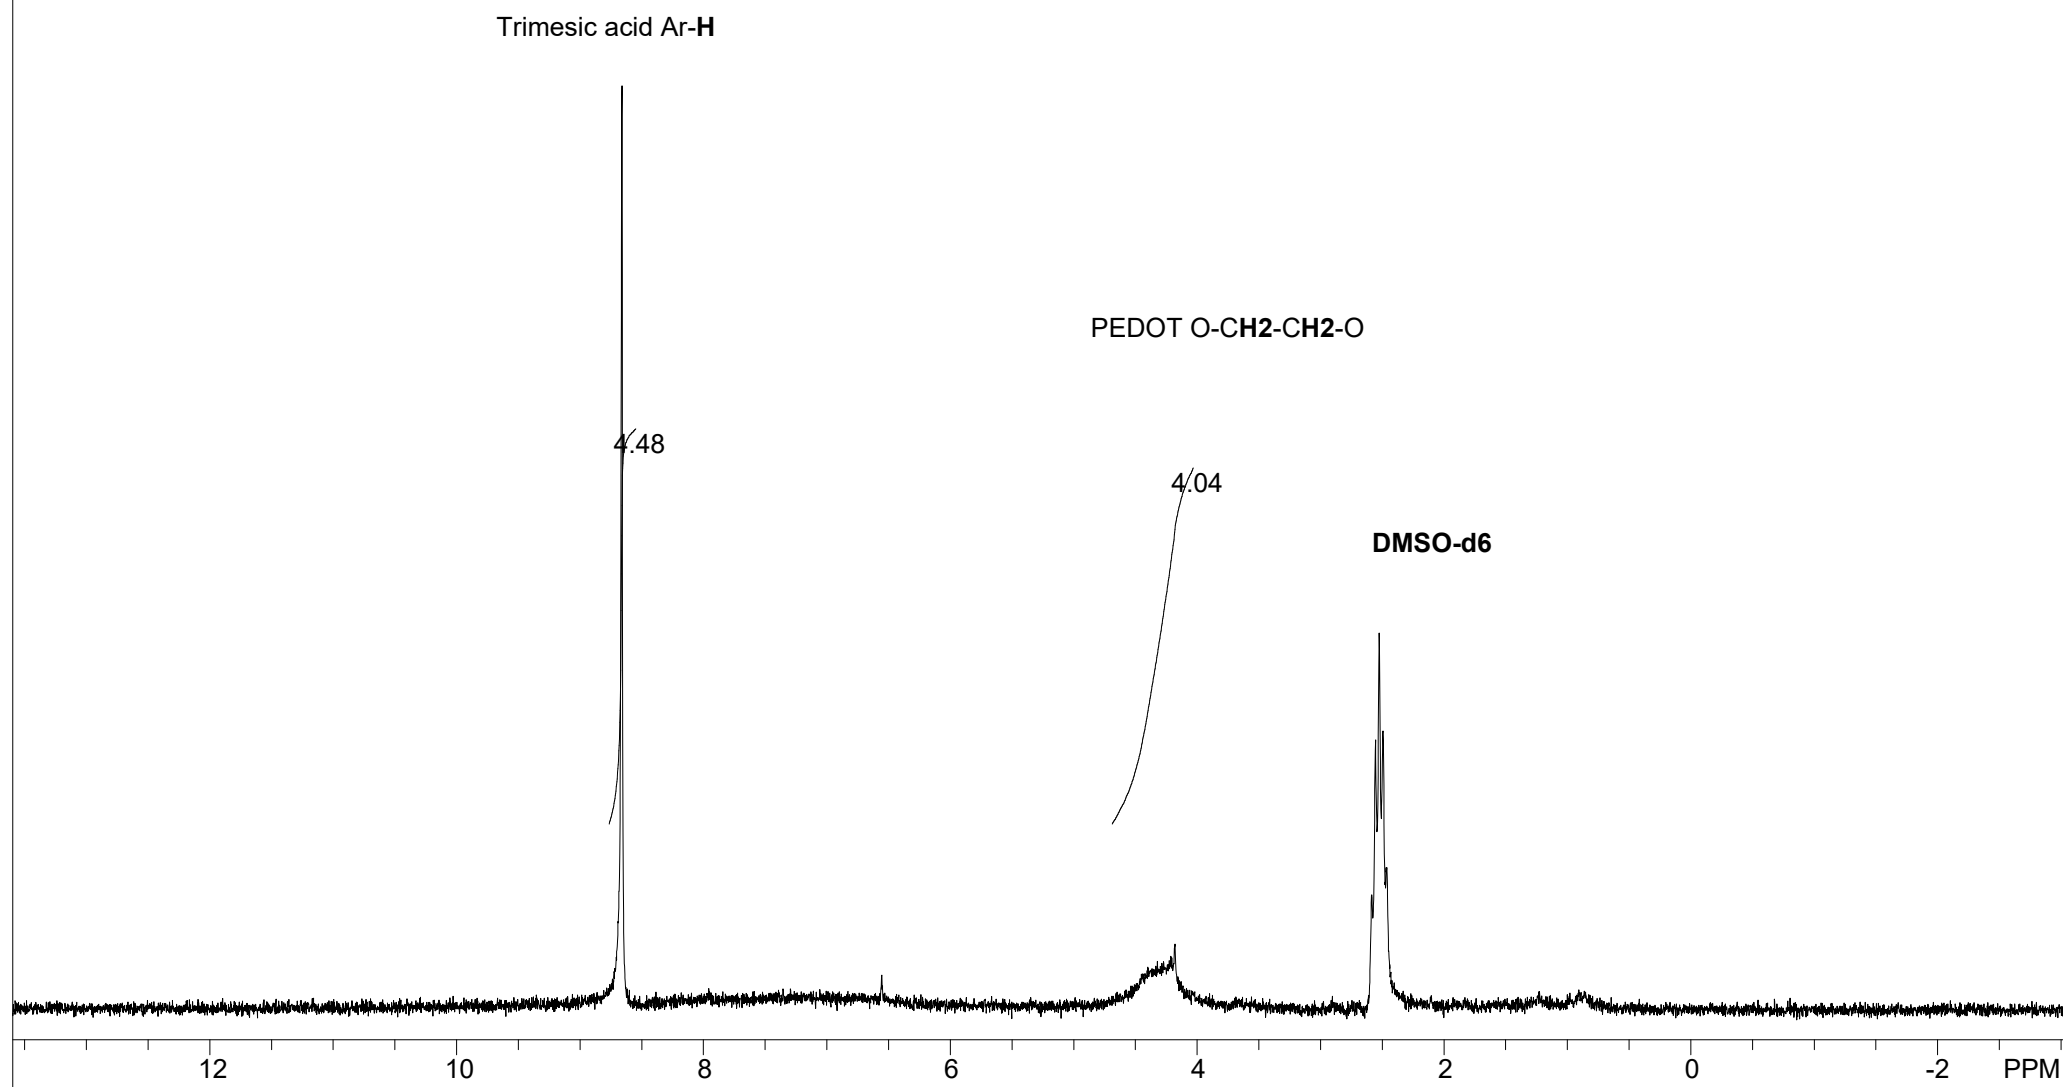

USER: -- DATE: 04/13/21 (17:20)

|                      |            |             |                                |
|----------------------|------------|-------------|--------------------------------|
| F1: 60.010           | SW1: 1000  | OF1: 316.0  | PTS1d: 8192                    |
| EX: c:\eft\H1\ZG.ppg | PW: 9.2 us | PD: 5.0 sec | NA: 8                          |
|                      |            | LB: 0.0     | Nuts - enb15p3_etch_EDOTHexane |

Figure S18: Neat EDOT composite, etched

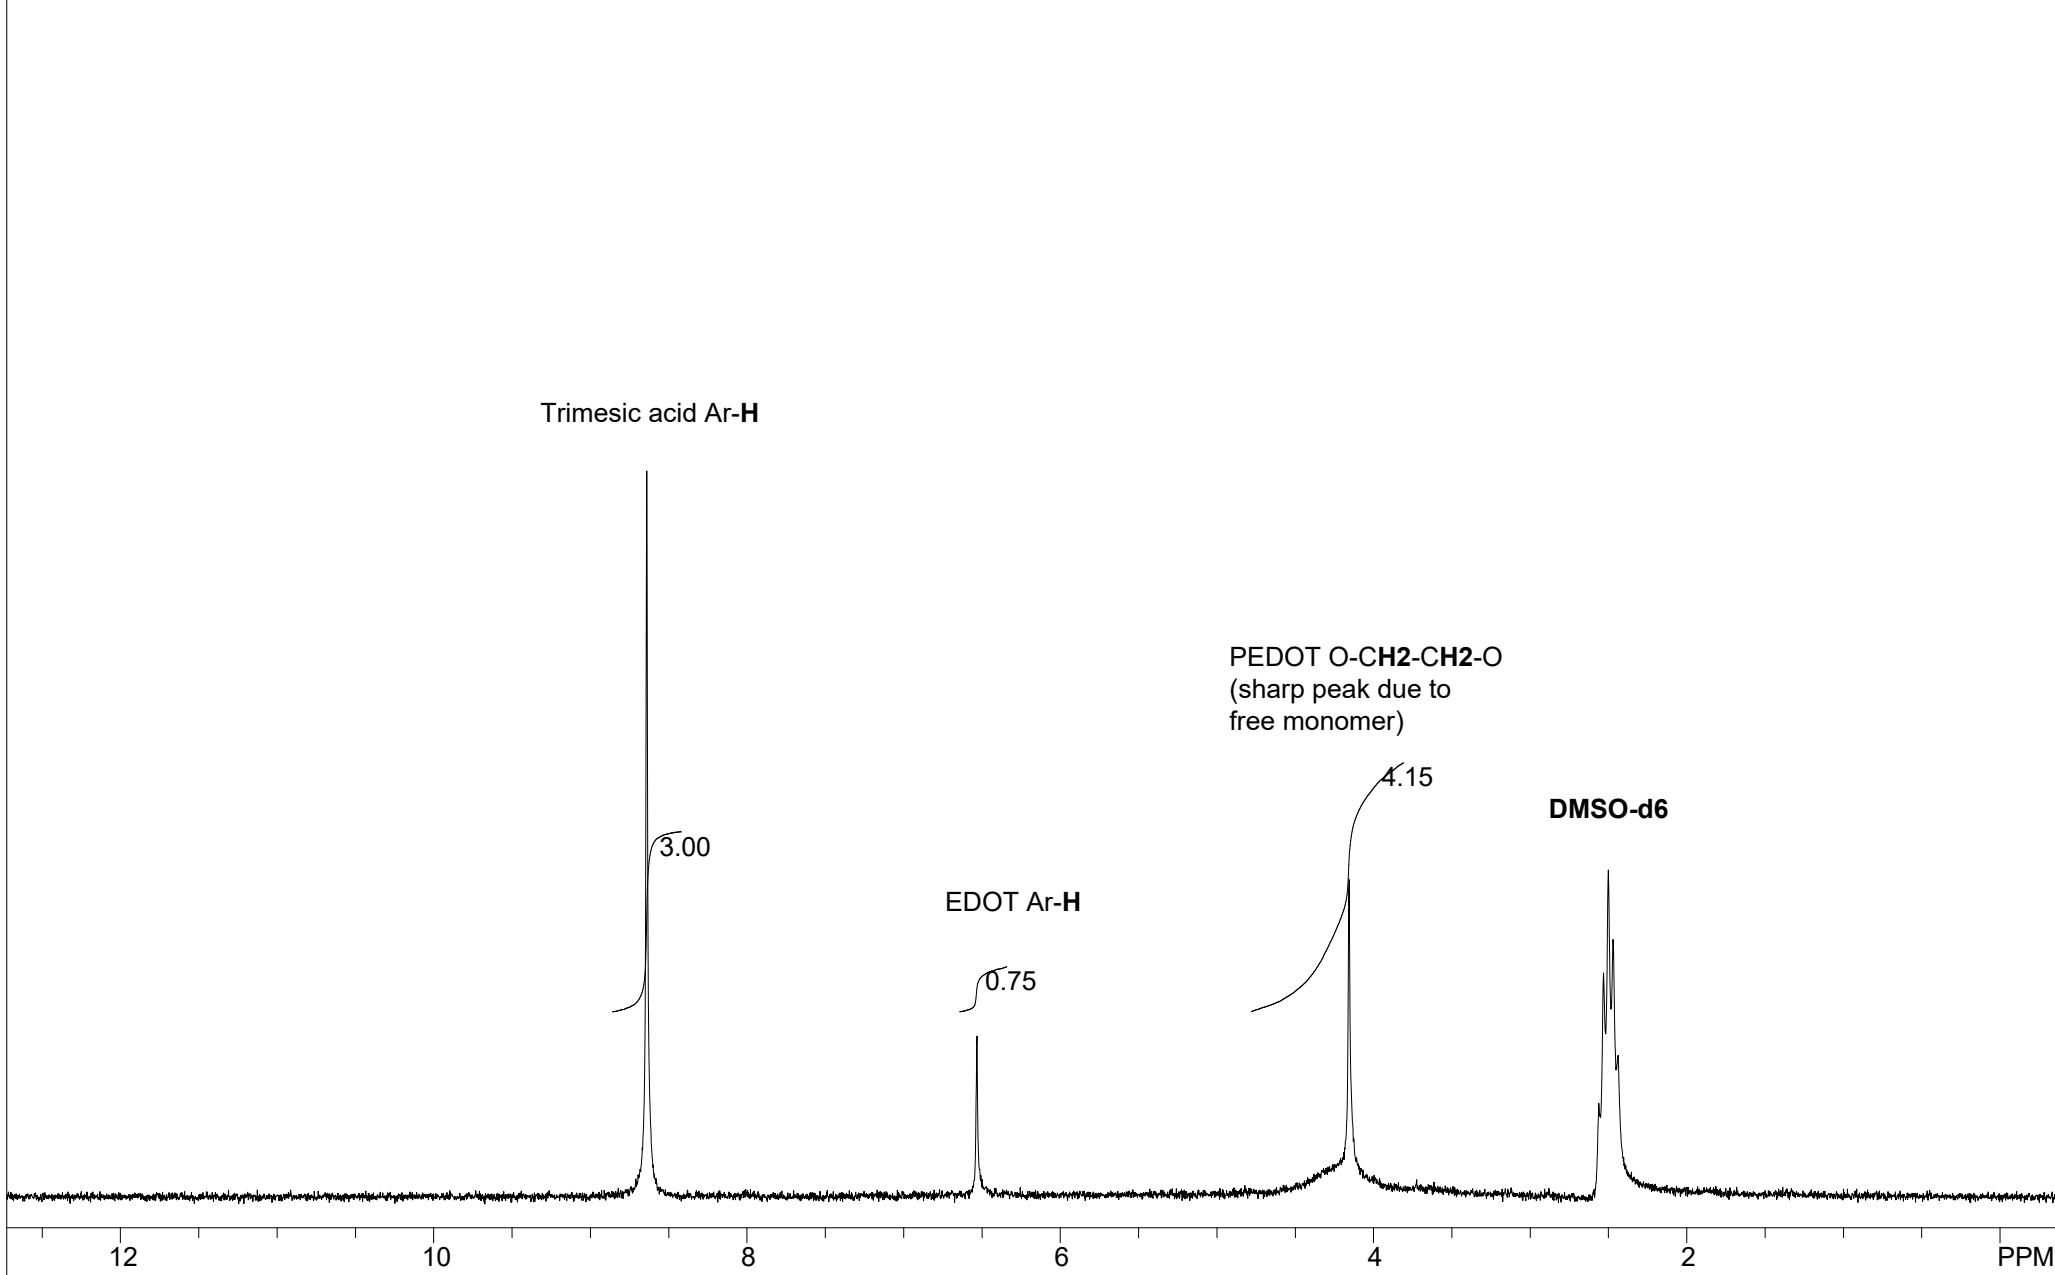

USER: -- DATE: 04/13/21 (13:29)

|                      |            |             |                              |
|----------------------|------------|-------------|------------------------------|
| F1: 60.010           | SW1: 1000  | OF1: 323.7  | PTS1d: 8192                  |
| EX: c:\eft\H1\ZG.ppg | PW: 9.2 us | PD: 5.0 sec | NA: 16                       |
|                      |            | LB: 0.0     | Nuts - enb15p3_etch_NeatEDOT |

Figure S19: Hexane loaded 3HOT composite, etched

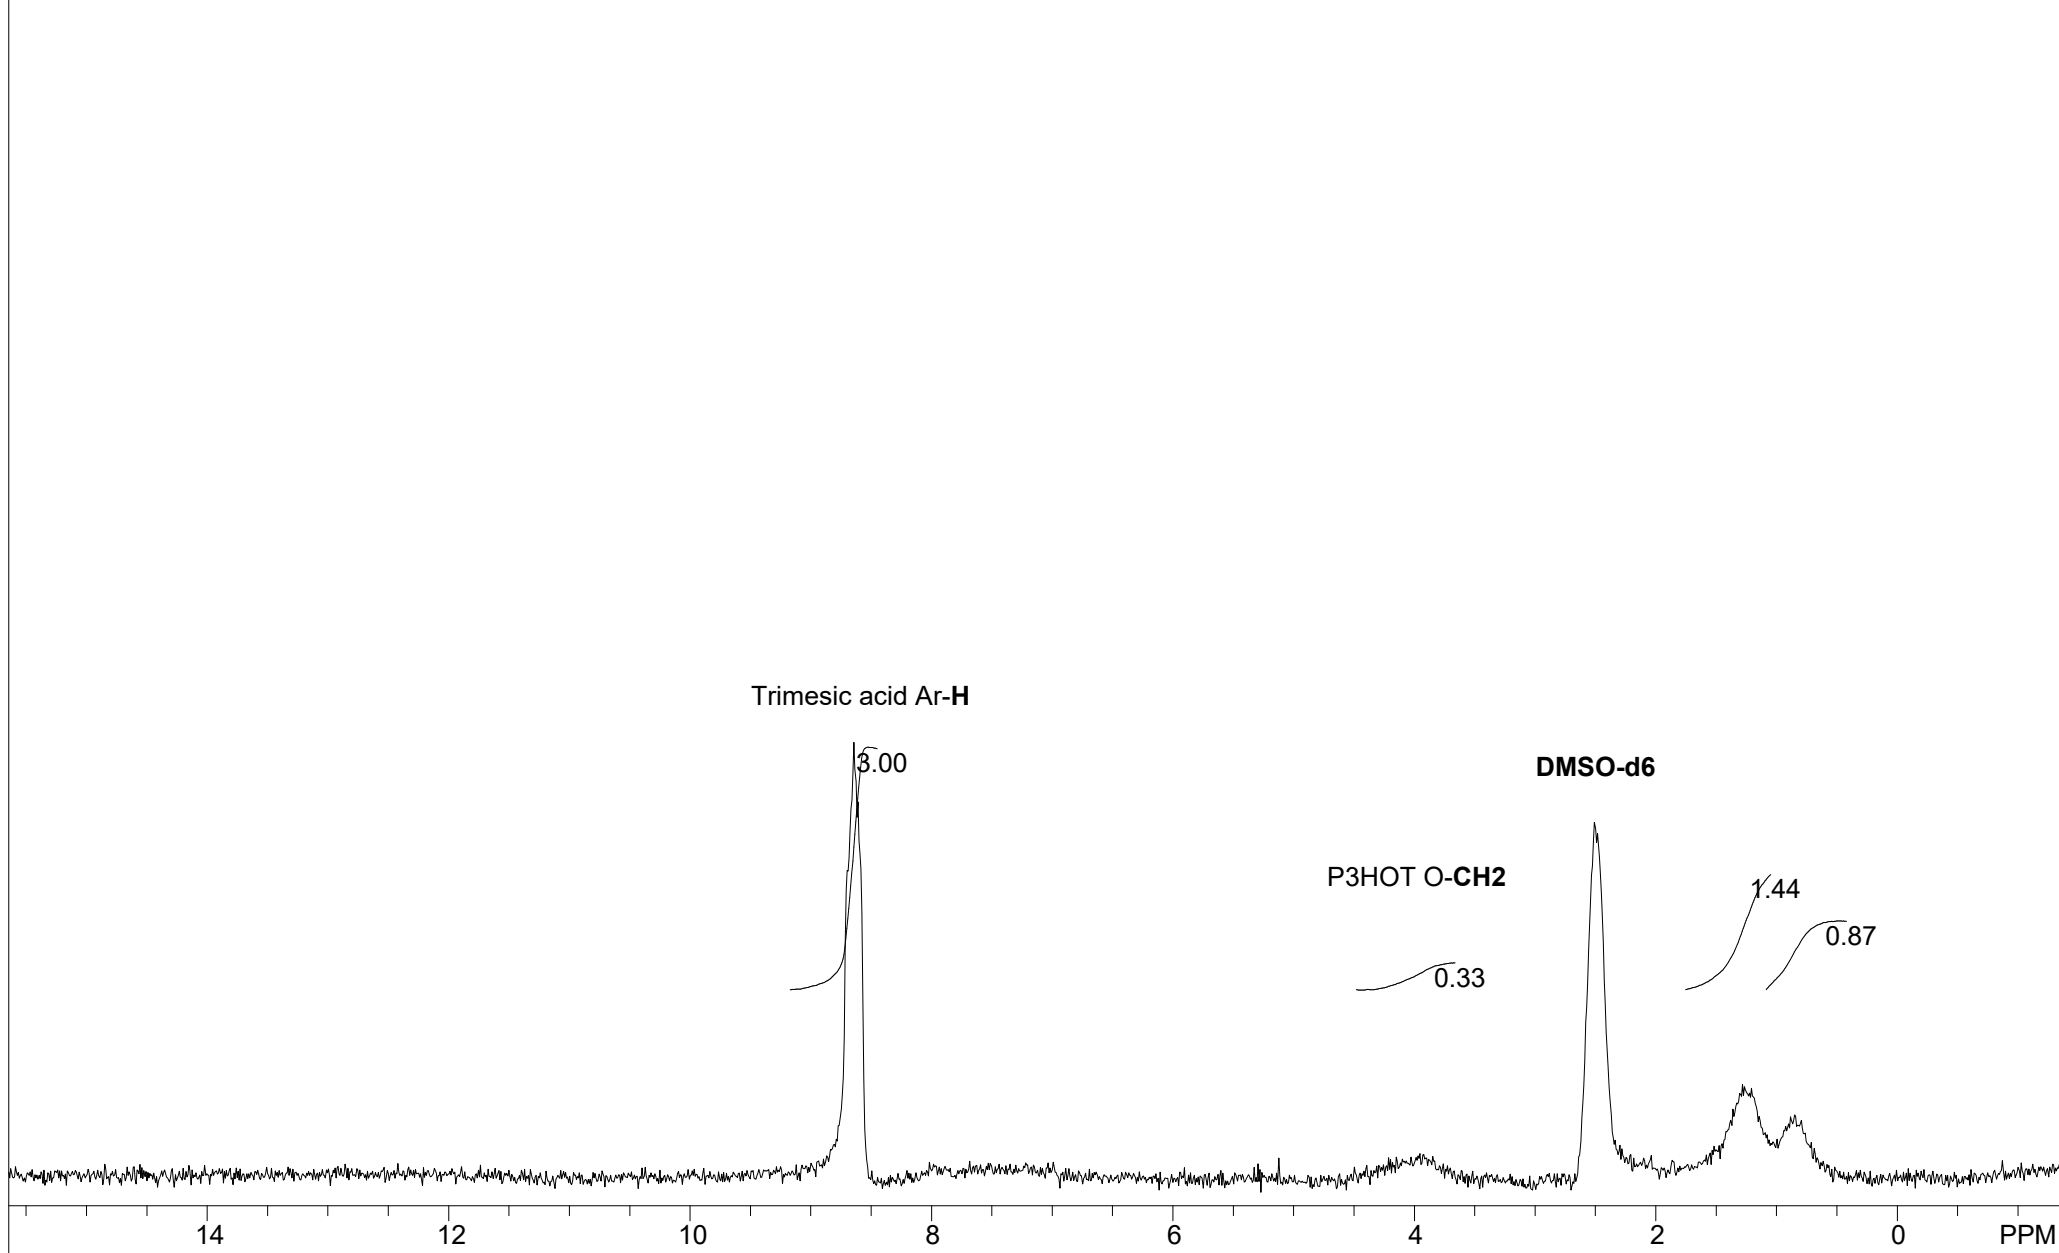

USER: -- DATE: 04/15/21 (17:56)

|                      |            |             |                                  |
|----------------------|------------|-------------|----------------------------------|
| F1: 60.010           | SW1: 3994  | OF1: 307.7  | PTS1d: 8192                      |
| EX: c:\eft\H1\ZG.ppg | PW: 1.5 us | PD: 5.0 sec | NA: 128                          |
|                      |            | LB: 0.0     | Nuts - enb15p3_etch_HexOHexanes1 |

Figure S20: Neat 3HOT composite, etched

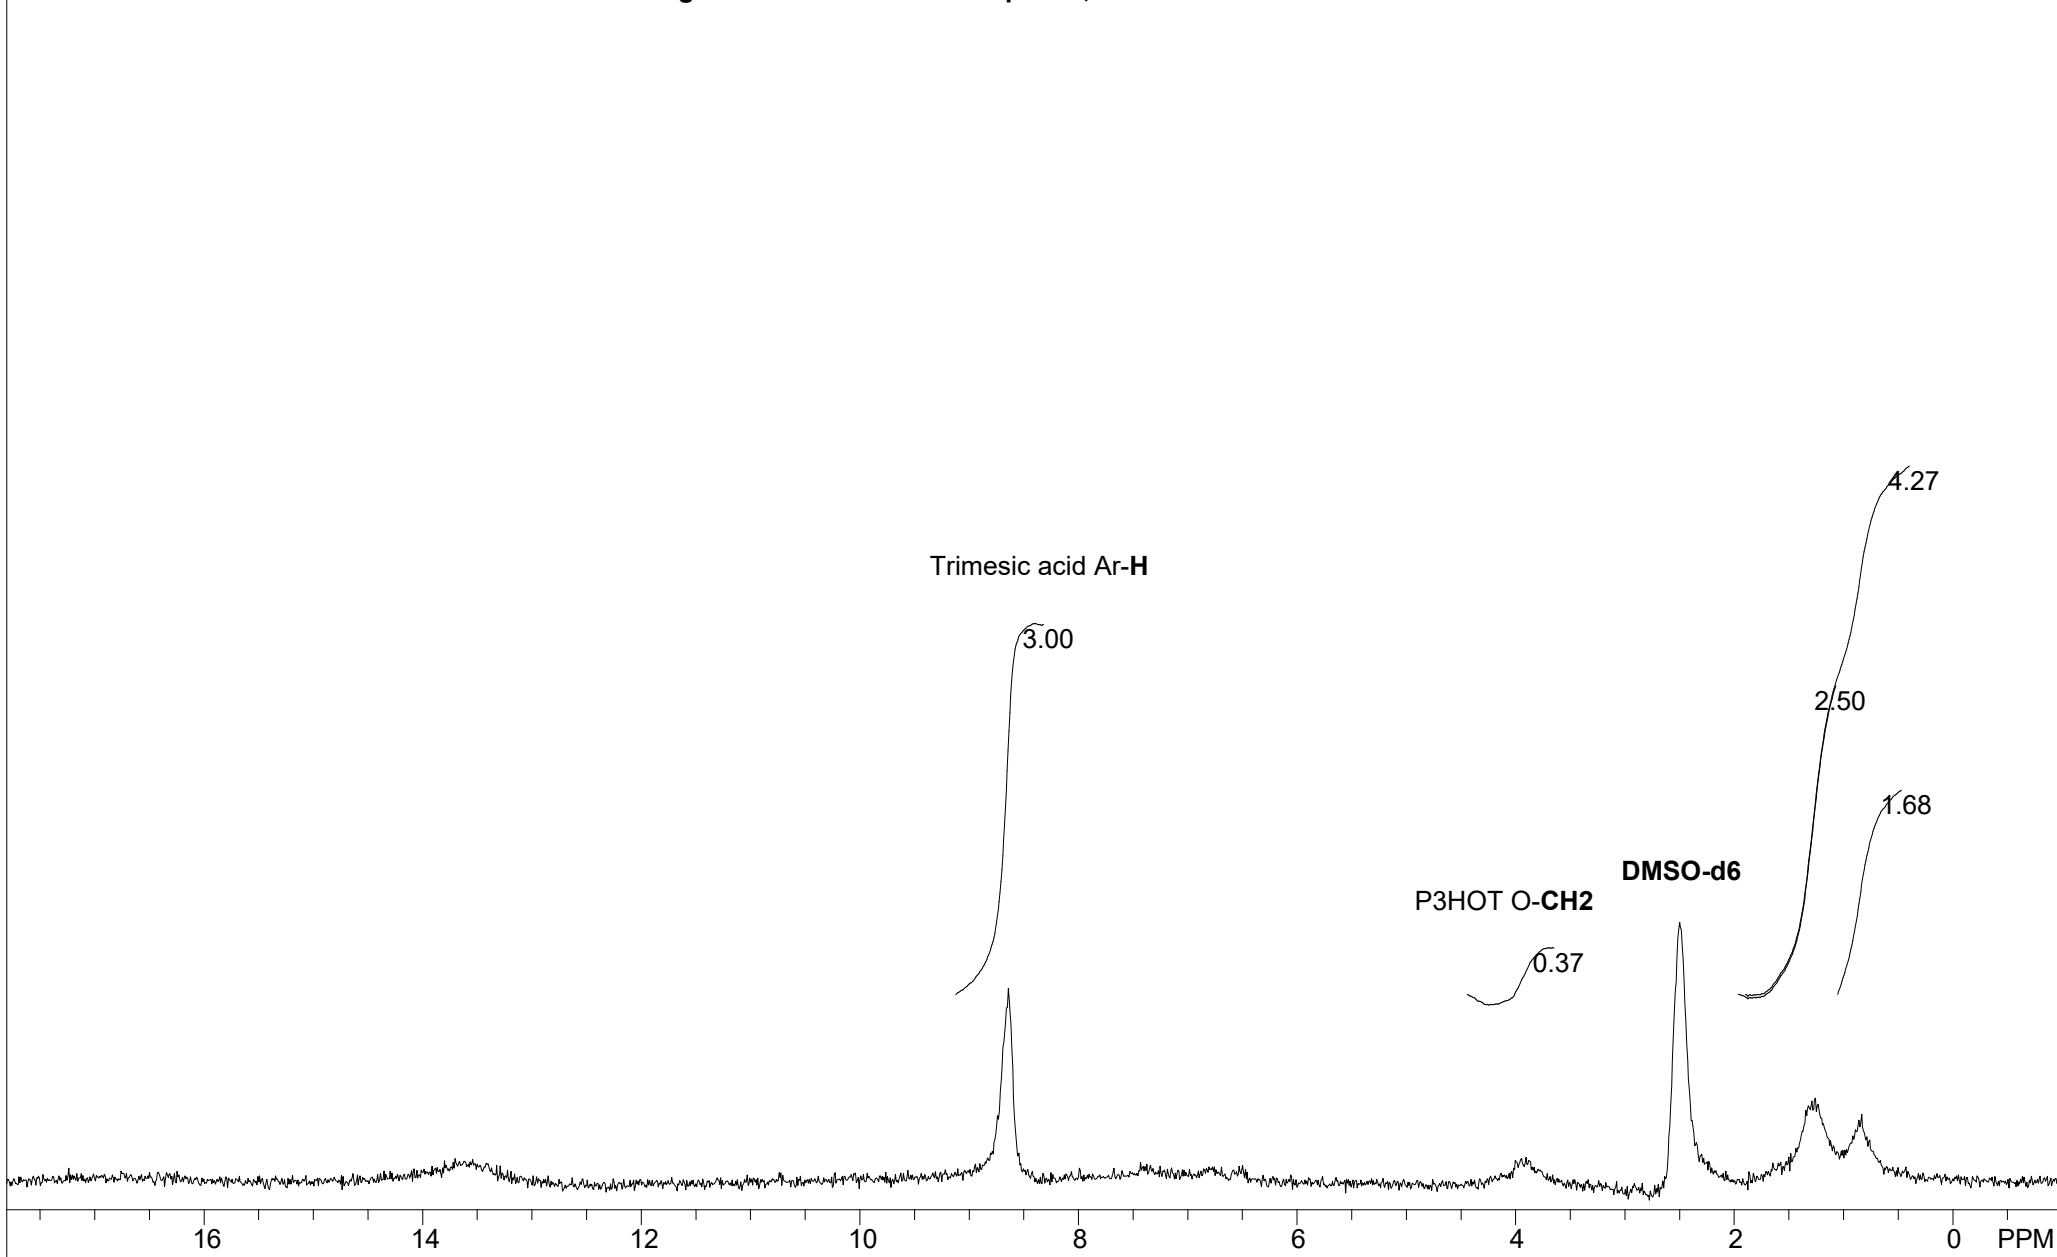

USER: -- DATE: 04/15/21 (17:14)

|                      |            |             |                                 |
|----------------------|------------|-------------|---------------------------------|
| F1: 60.010           | SW1: 3994  | OF1: 333.6  | PTS1d: 8192                     |
| EX: c:\eft\H1\ZG.ppg | PW: 1.5 us | PD: 5.0 sec | NA: 128                         |
|                      |            | LB: 0.0     | Nuts - enb15p3_etch_HexONeat2_1 |

Figure S21: Hexane loaded 3MOT composite, etched

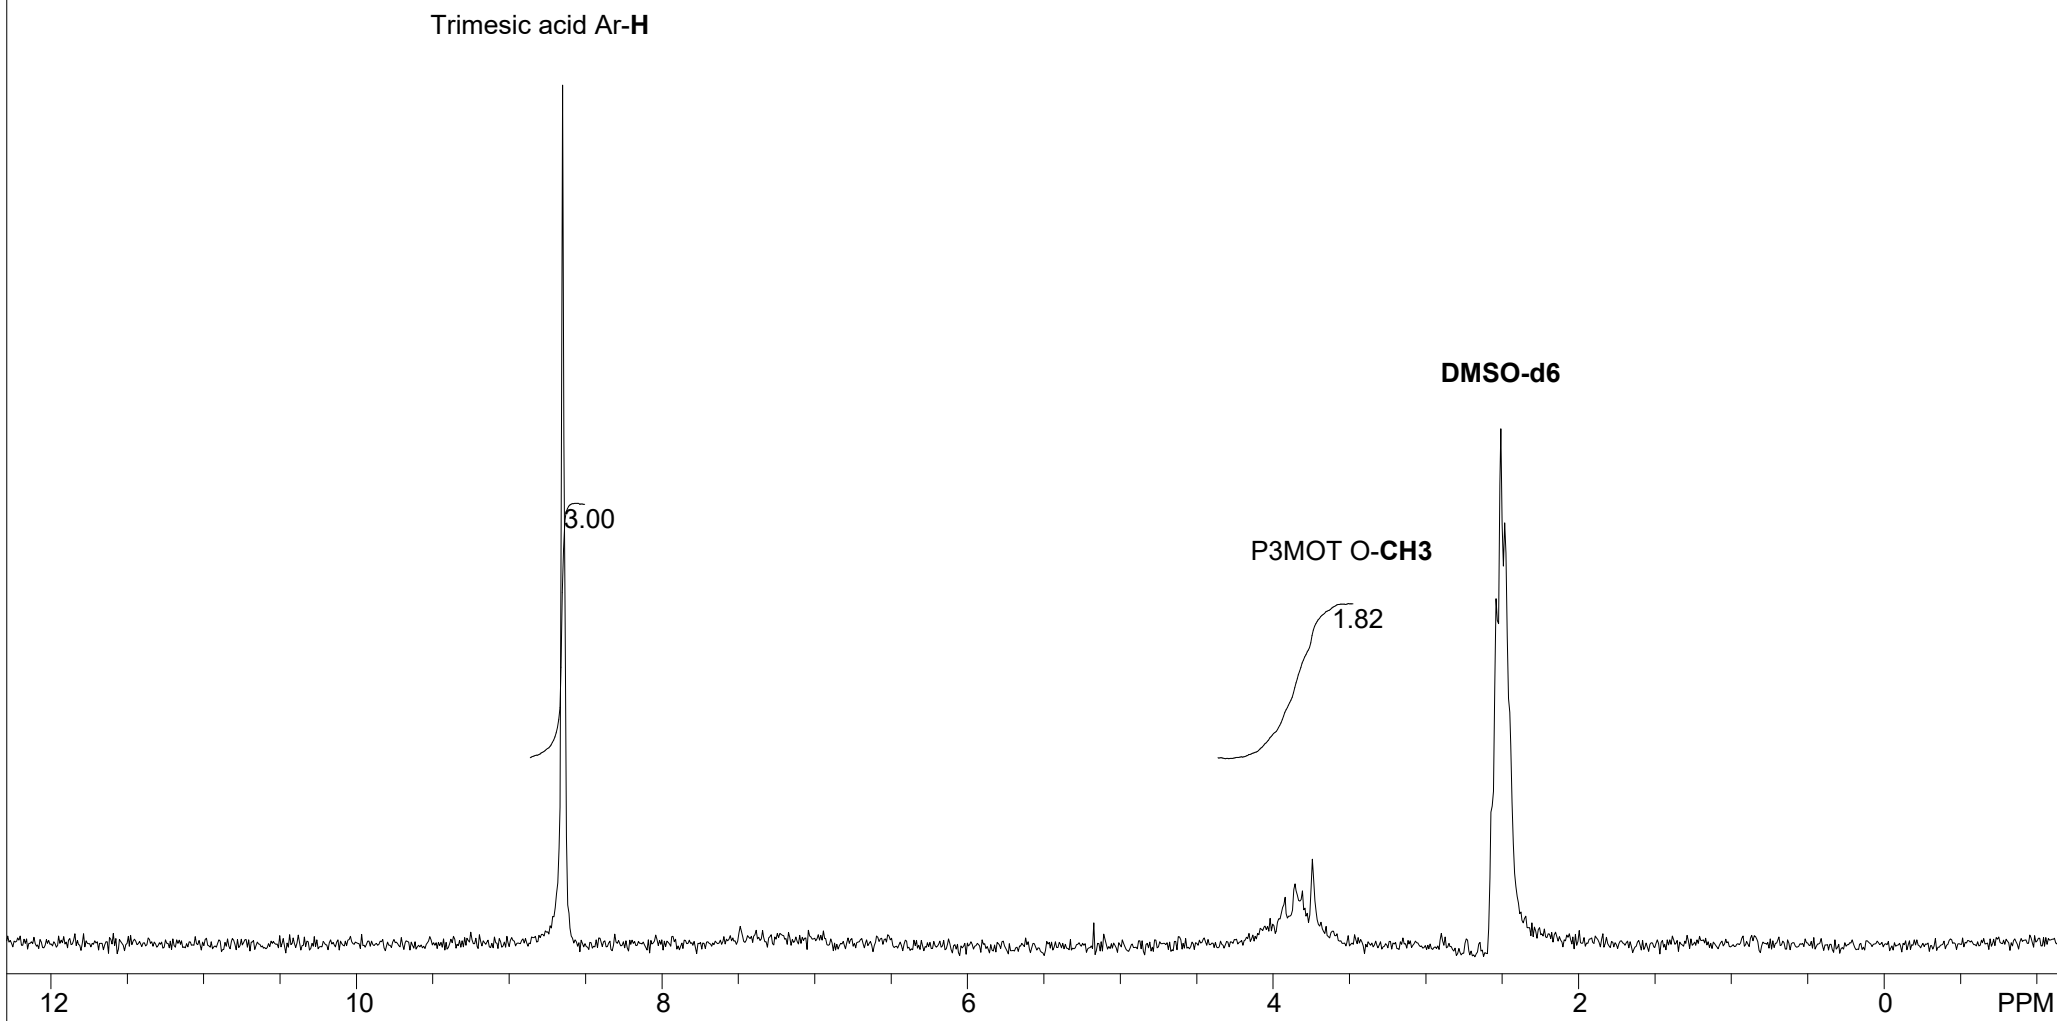

USER: -- DATE: 04/15/21 (16:29)

|                      |            |             |                                 |
|----------------------|------------|-------------|---------------------------------|
| F1: 60.010           | SW1: 3994  | OF1: 310.7  | PTS1d: 8192                     |
| EX: c:\eft\H1\ZG.ppg | PW: 1.5 us | PD: 5.0 sec | NA: 128                         |
|                      |            | LB: 0.0     | Nuts - enb15p3_etch_MeOHexanes3 |

Figure S22: Neat 3MOT composite, etched

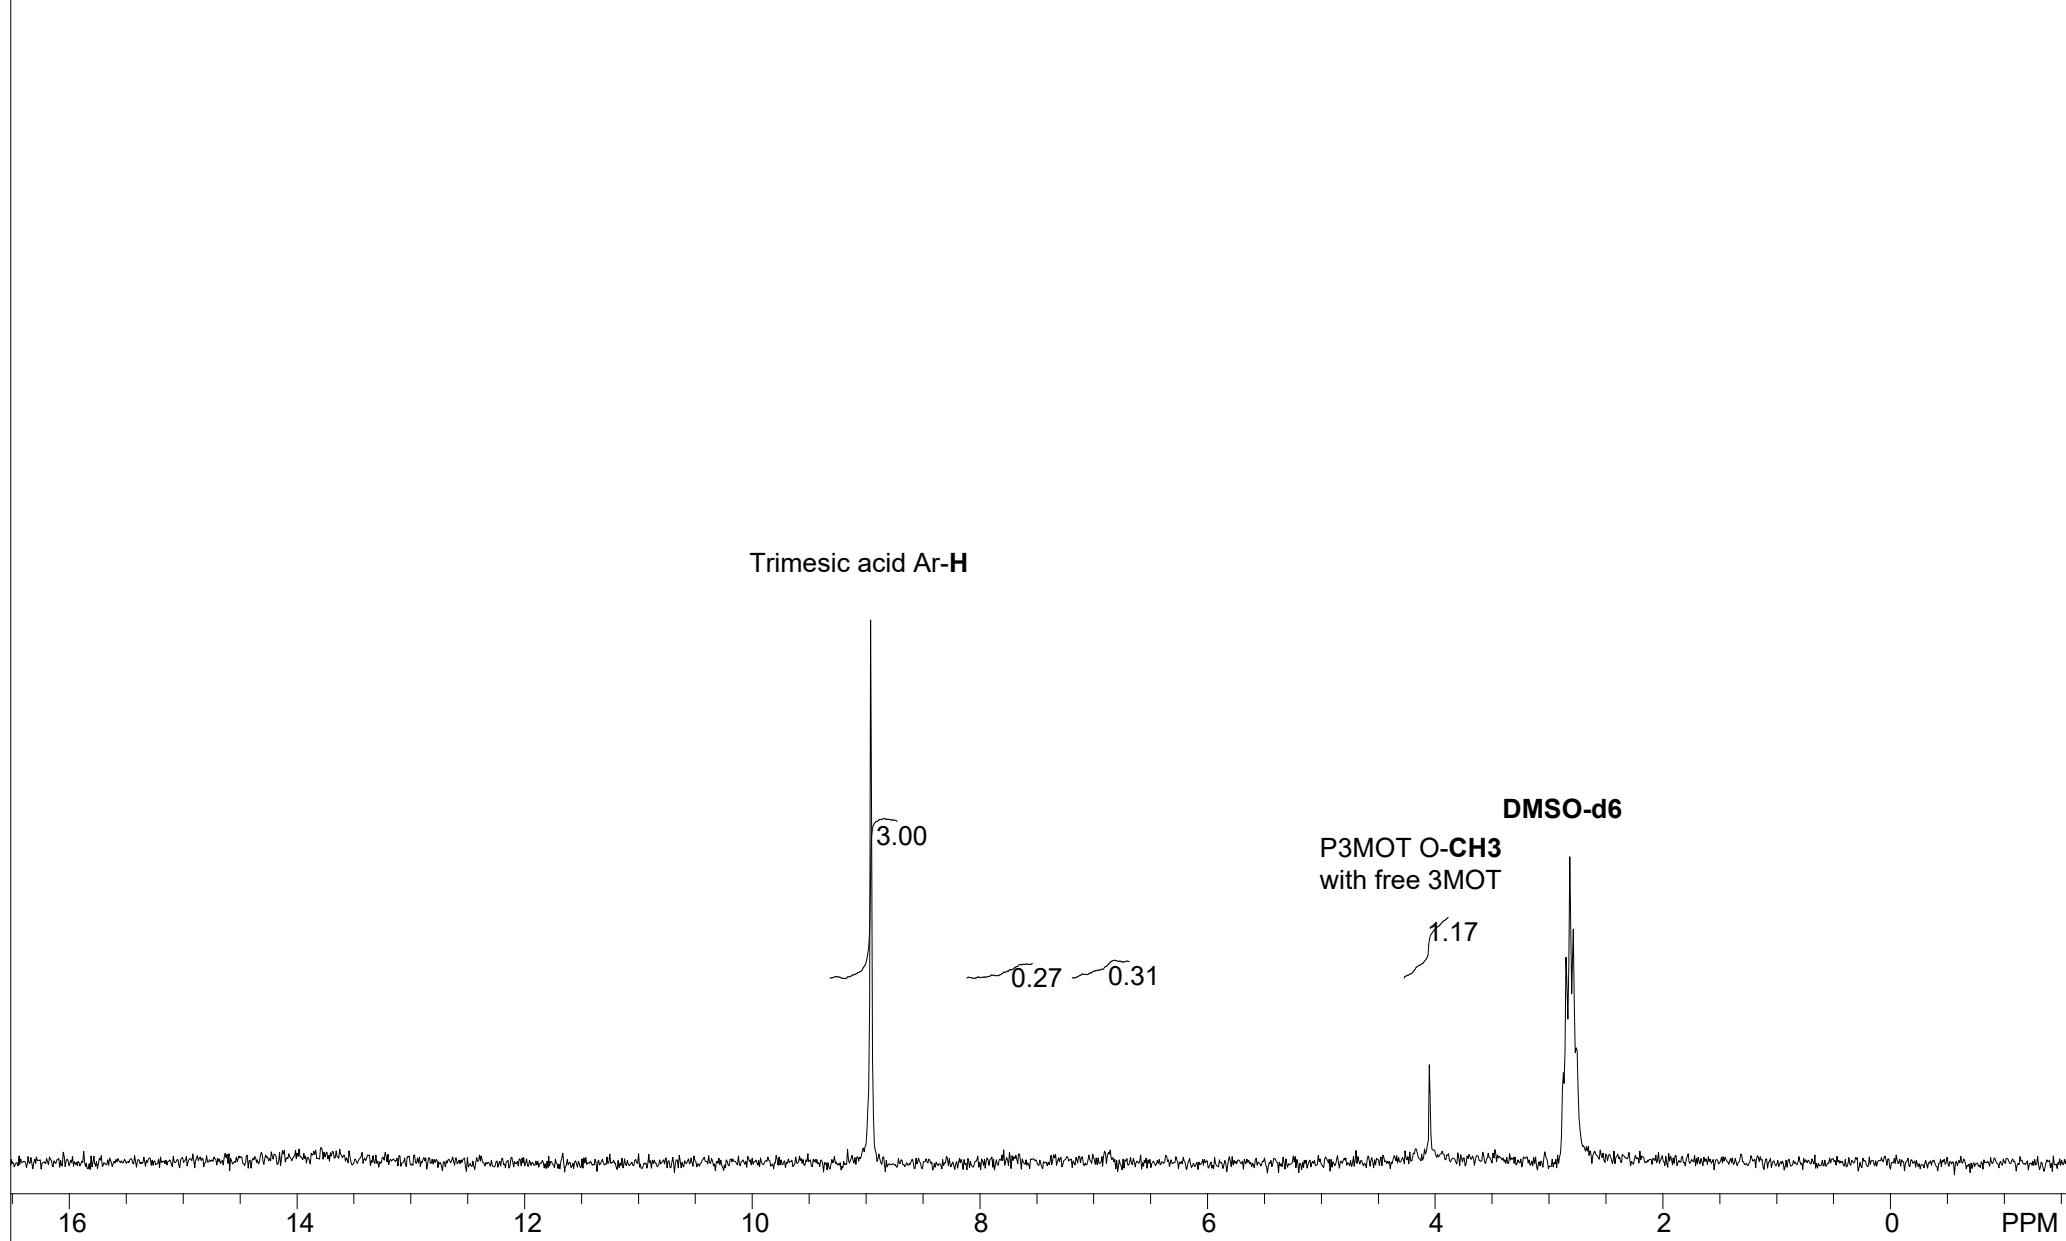

USER: -- DATE: 04/15/21 (14:17)

|                      |            |             |                              |
|----------------------|------------|-------------|------------------------------|
| F1: 60.010           | SW1: 3994  | OF1: 360.0  | PTS1d: 8192                  |
| EX: c:\eft\H1\ZG.ppg | PW: 1.5 us | PD: 5.0 sec | NA: 32                       |
|                      |            | LB: 0.0     | Nuts - enb15p3_etch_MeONeat2 |
